# Supplementary material
Source: Springer Nature journal article supplement (https://www.springermedizin.de/resource/supplementary/12875_2010_526_MOESM3_ESM.pdf/9434952)
Supplement: MOESM3 [file 9434952]

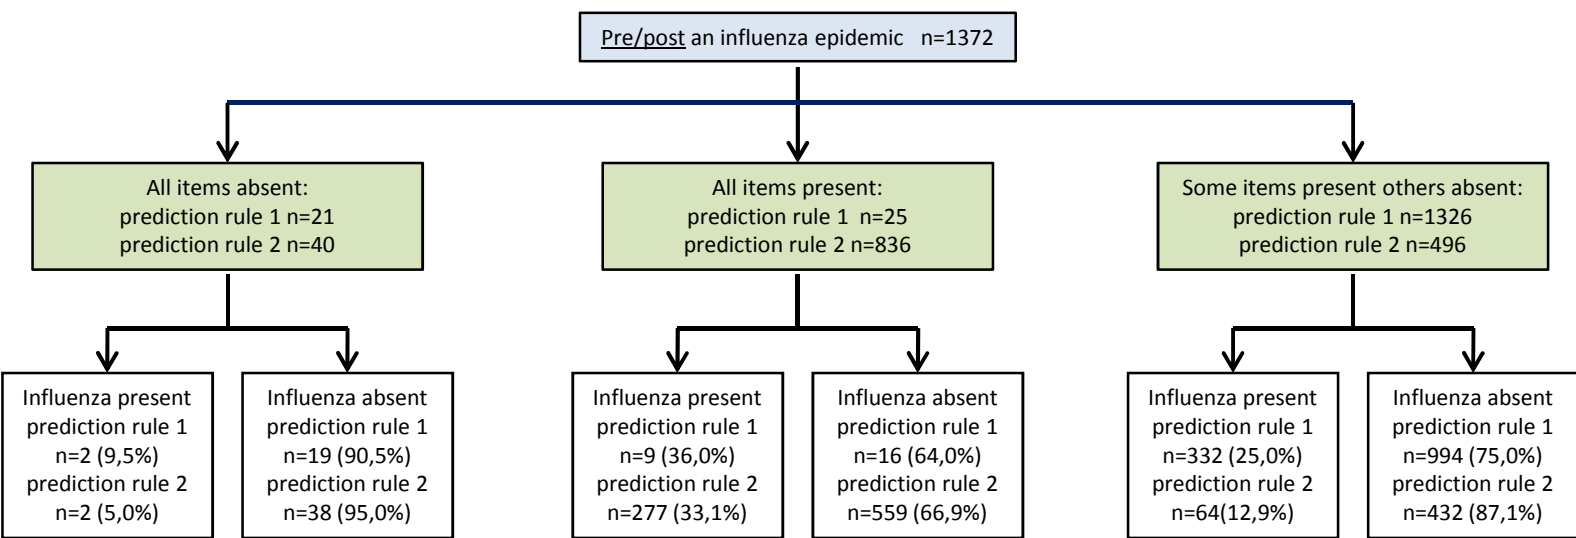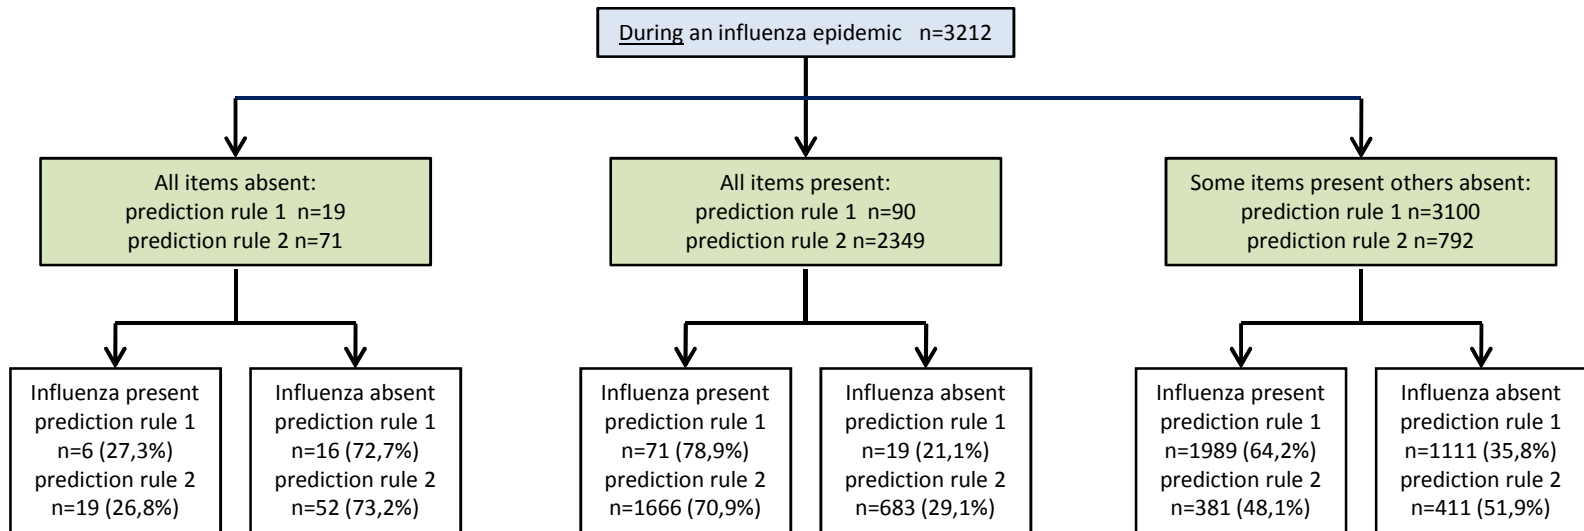

Prediction rule 1 = ILI contacts, cough, expectoration on the first day, temperature >37,8°C

Prediction rule 2 = cough, temperature >37,8°C
